# Supplementary material for: Decoding the RNA binding systems by UltraGen
Source: Research Square preprint supplement (doi:10.21203/rs.3.rs-4461517/v2), 2025-05-08
Supplement: Supplementary file 2 [file a256a186cce372d89ac99b4d.pdf]

## Supplementary Materials

### Decoding the RNA binding systems by UltraGen

Hui Wang<sup>1,6</sup>, Zhaoming Chen<sup>1,6</sup>, Wenjun Lin<sup>1</sup>, Yuan Jiang<sup>2</sup>, Jingye Zhang<sup>2</sup>, Wenhao Huang<sup>1</sup>,  
Yonggui Fu<sup>4</sup>, Hongwang Xiao<sup>1,5</sup>, David Kuster<sup>3</sup>, Andres Jäschke<sup>2</sup>, Qiwei Ye<sup>1\*</sup>, Yaqing Zhang<sup>1,2\*</sup>

<sup>6</sup> These authors contributed equally to this work.

\*Correspondence: [qwye@baai.ac.cn](mailto:qwye@baai.ac.cn) and [yaqing.zhang@uni-heidelberg.de](mailto:yaqing.zhang@uni-heidelberg.de).

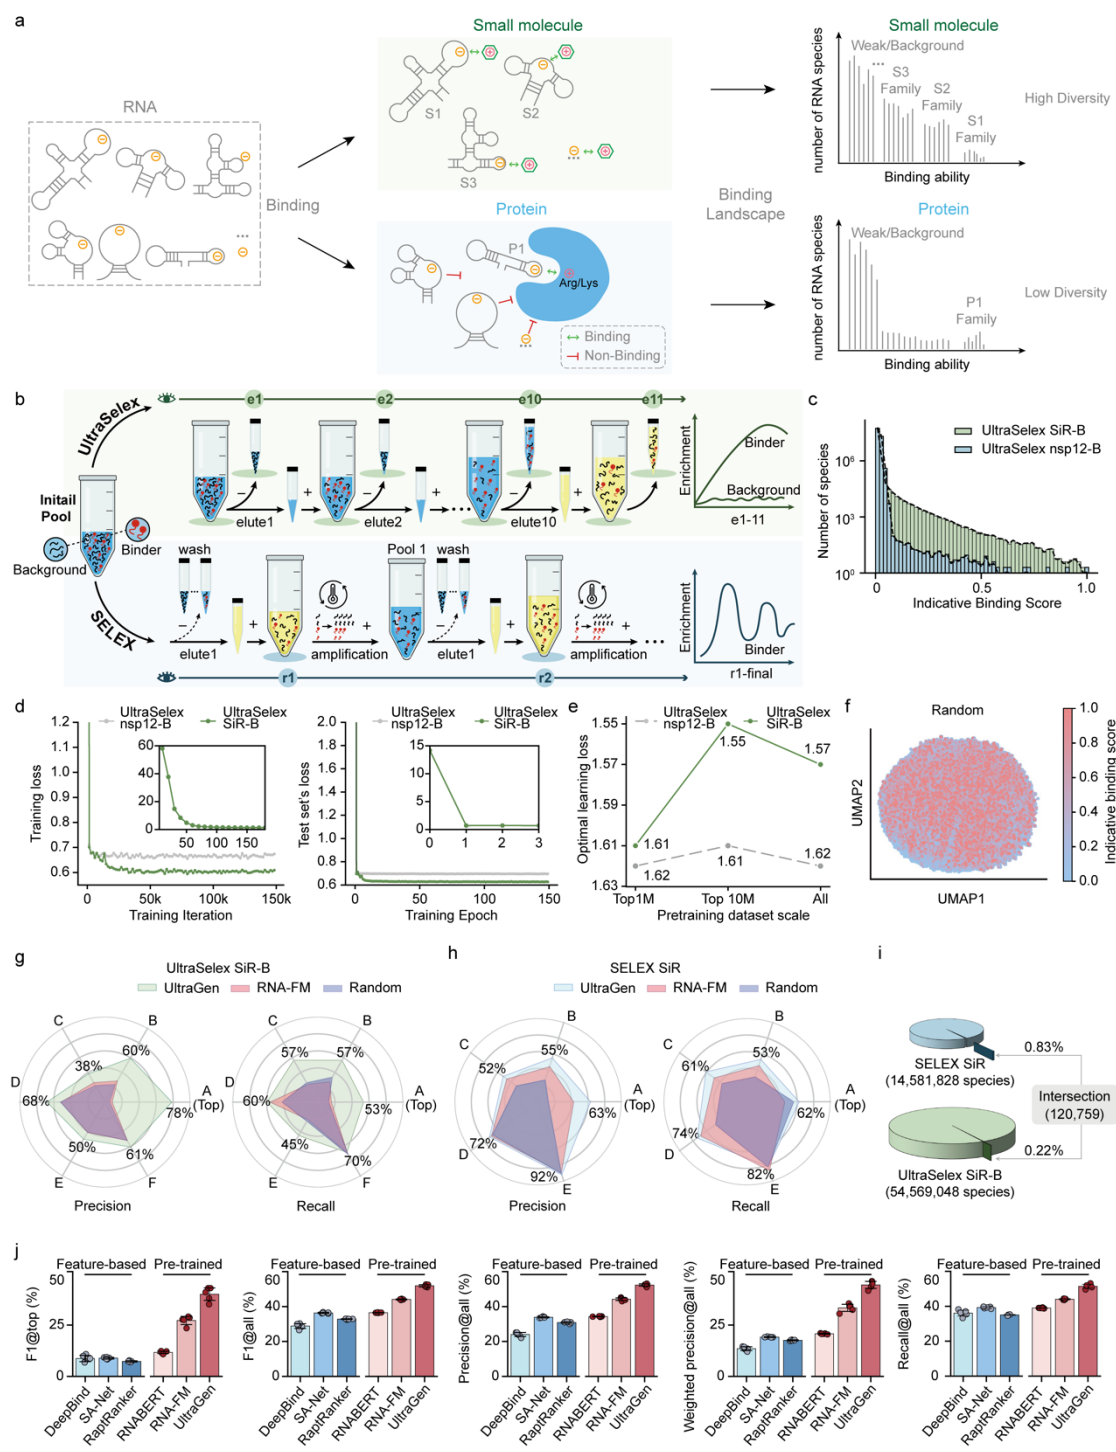

**Extended Data Fig. 1: Pre-training UltraGen on various RNA binding systems and comparing model performance.**

**a**, Schematic illustration of RNA interactions with small ligands and proteins based on their electrostatic properties, determined by the positively charge. The target-derived geometric constraints result in differences in the diversity of the binding landscape between interactions with small molecules and proteins.

**b**, Differential enrichment pathway of RNA-target binding between SELEX and UltraSelex<sup>1</sup> techniques. SELEX discontinuously enriches RNA binders, with certain losses occurring during

washing steps across multiple rounds. This iterated process introduces intermediate enzymatic amplification biases, such as T7 RNA polymerase and reverse transcriptase, which leverage RNA abundance regardless of binding strength. In contrast, UltraSelex exhibits a continuous monotonic distribution of enriching RNA binders in a systematic gradient trend within a single round.

**c**, Distribution of RNA species based on the normalized UltraSelex SGREELI *auc* values, here referred to as "Indicative binding score", compared between UltraSelex silicon rhodamine molecule (SiR)-B and UltraSelex non-structure protein 12 (nsp12)-B RNA dataset.

**d**, UltraGen's average learning loss on the training (left) and test (right) set of UltraSelex SiR-B and UltraSelex nsp12-B RNA dataset throughout the learning process. The inset line plots depict the learning loss in the initial training phase. The held-out test set comprised 2% of the total sequences, ensuring less than 90% identity to the training set as determined by CD-HIT.

**e**, Comparing the exponential learning loss on the held-out test sets for different sizes of the training set. The UltraSelex SiR-B and UltraSelex nsp12-B dataset were analyzed and sorted by SGREELI *auc* value in descending order for corresponding binning. The held-out test set was constructed as same in panel d.

**f**, UMAP projections of top one million RNA binders from UltraSelex SiR-B by randomly initialized UltraGen, colored by UltraSelex SGREELI *auc* values ("Indicative Binding Score").

**g&h**, Model performance metrics in ranking the held-out test sets of UltraSelex SiR-B system (**g**) and SELEX SiR system (**h**), respectively. Pre-trained UltraGen ("UltraGen", depicted in red or blue) was compared against the RNA-FM (depicted in salmon) and randomly initialized UltraGen ("Random", depicted in light purple). The UltraSelex SiR-B RNA set, ordered alphabetically from A (top 0.01%), B (top 0.01-0.05%), C (top 0.05-0.1%), D (top 0.1-0.5%), E (top 0.5-1%) to F(top 1-100%), was based on the UltraSelex SGREELI *auc* values. The SELEX SiR RNA set, ordered from A (top 1%), B (top 1-5%), C (top 5-12%), D (12-100%), E (Background, no detection on the final round), was based on the sequence abundance in the final round (the 14<sup>th</sup>). For classification details, see Supplementary Table 1.

**i**, Marginal intersection between UltraSelex SiR-B and SELEX SiR RNA datasets. All overlapped identical species were excluded from the SELEX SiR dataset for model evaluation in Fig. 2c, irrespective of their binding labels. The detailed counts of RNA species, including those from the downsampling strategy for data balance in each binding category, are provided in Supplementary Table 1.

**j**, Model ranking comparison for top binders ("@top", identical to that in Fig. 1c) and all binders ("Weighted") between UltraGen and other deep learning models on the held-out test sets. The test sets consist of 30% of the total sequences, containing multiple categories (Supplementary Table 1).

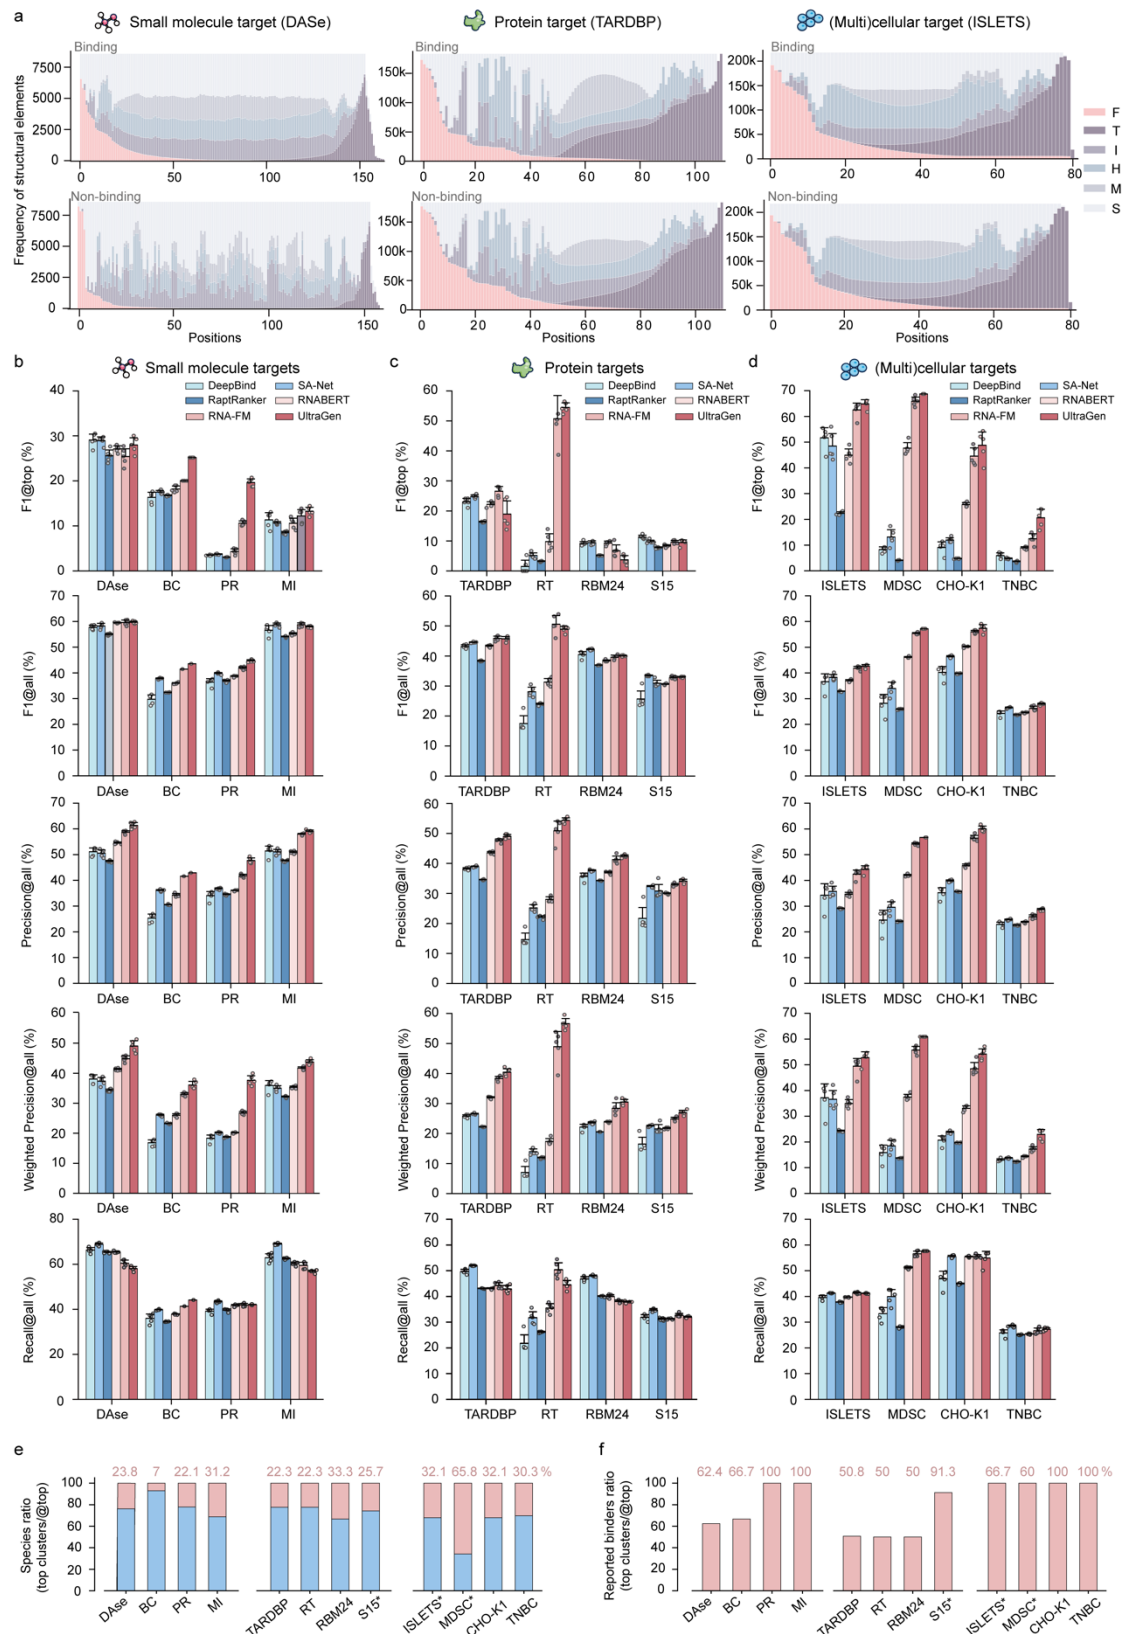

**Extended Data Fig. 2: Comprehensive ranking of RNA binders in SELEX systems by UltraGen and other deep learning models.**

**a**, Distribution structural discrepancy of RNA species from the SELEX systems in Fig.2a, distinguishing enriched ("Binding") and not enriched ("Non-binding") species. Each nucleotide

of RNA species was labeled using the LinearPartition<sup>2</sup> approach with one of following structural properties: dangling start (F), dangling end (T), internal loop (I), hairpin loop (H), multi-branched loop (M), and stem (S).

**b&c&d**, Ranking performance on RNA binding system to small molecule (**b**), protein (**c**), and (multi)cellular targets (**d**) between UltraGen and other deep learning models. The evaluated model metrics includes *F1@top*, *F1@all*, *Precision@all*, and *Weighted Precision@all*. The '@top' metrics focus on the top binders, while '@all' metrics address all RNA species. The weighting approach was based on categories with hierarchical binding potential. Full names of targets are in Supplementary Table 2. Error bars represent mean+standard deviation. Model replicates were initiated with independent random seeds, with n=5.

**e**, The ratio of the RNA species from the top clusters of UltraGen predictions to that in the top category, colored in red. The top five clusters (denoted without “\*”) and the top twelve clusters (denoted with “\*”) based on their total HTS counts were summarized.

**f**, The ratio of known RNA binders in the top clusters of UltraGen predictions (panel d) to that in the top category. The known binders in DAsE, MI, TARDBP, RBM24 were inferred from the corresponding reported core binding patterns<sup>3, 4</sup>, while the S15 binders<sup>5</sup> were inferred from similar sequences with an edit distance no more than four bases. The known binders of the remaining dataset were directly experimental verified<sup>6-12</sup>.

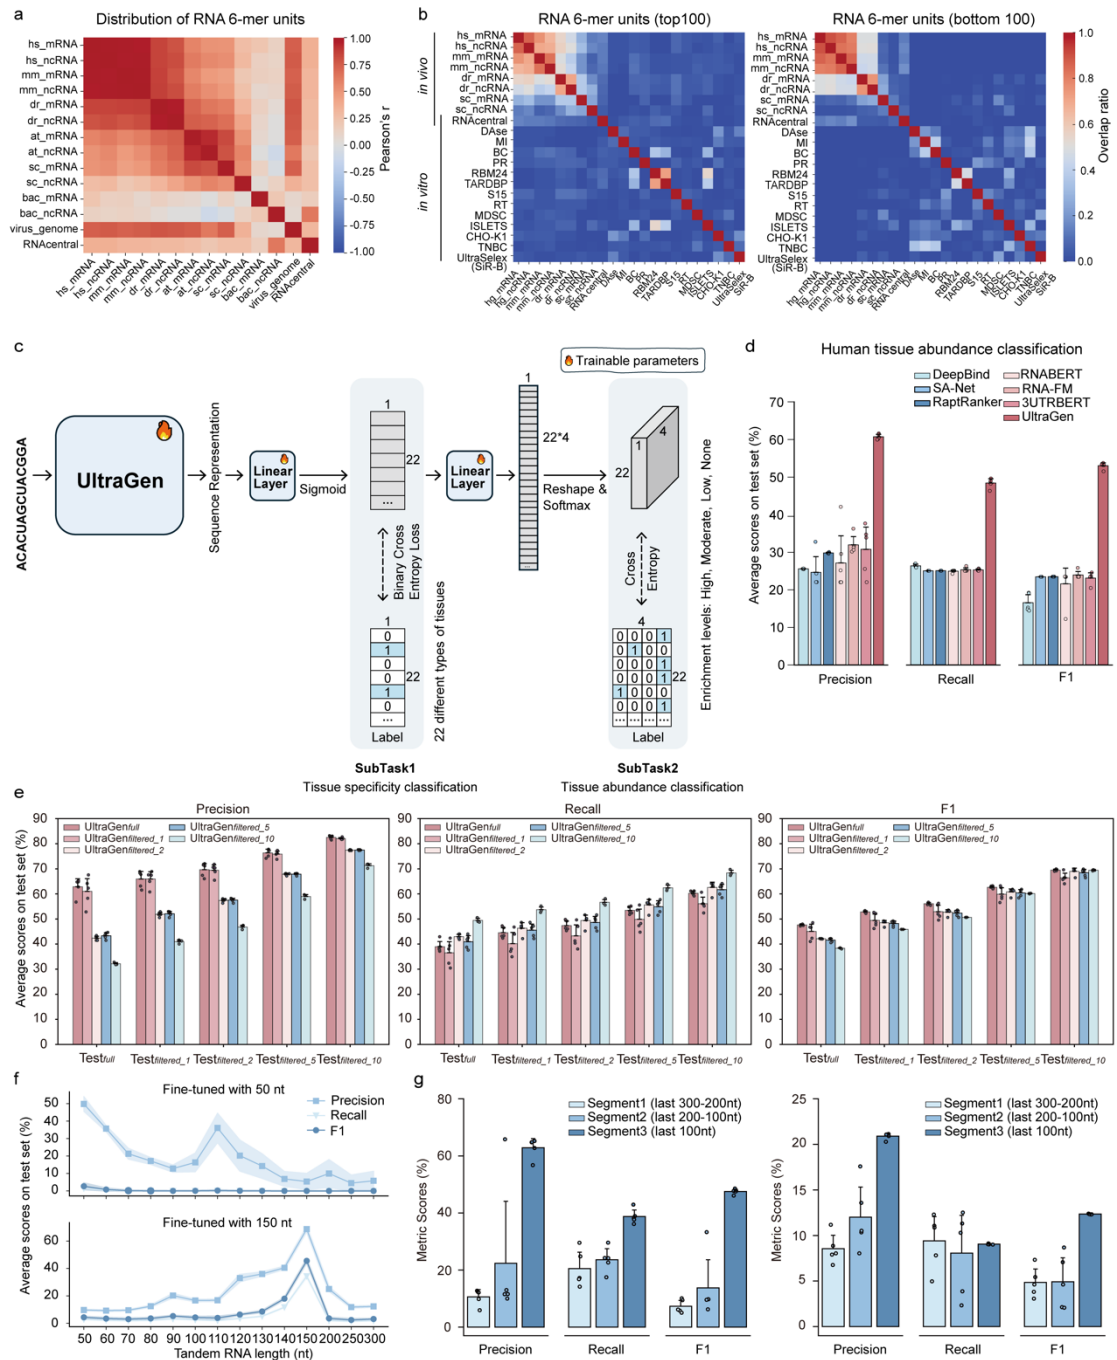

**Extended Data Fig. 3: Fine-tuning UltraGen with somatic 3'-UTRs from human tissues.**

**a**, Evolutionarily conserved distribution of RNA hexamer units across species. mRNA and ncRNA from *Homo sapiens* ("hs"), *Mus musculus* ("mm"), *Danio rerio* ("dr"), *Saccharomyces cerevisiae* ("sc"), *Arabidopsis thaliana* ("at"), 5508 random selected bacterial species ("bac"), RNACentral source ("RNACentral"), and RNA viruses ("virus\_genome") were compared, with colors representing Pearson correlations coefficient ("Pearson's  $r$ ", two-sided).

**b**, Disparity in overlap ratio among the top 100 enriched ("top 100", left) and bottom 100 enriched ("bottom 100", right) RNA hexamer units across species. Species abbreviations are consistent with panel a, while SELEX and UltraSelex dataset abbreviations are identical to those in Fig. 2b.

**c**, A multi-task joint framework of UltraGen integrating 22 human tissue types and four abundance levels. Briefly, during the tissue specificity calculation, each RNA species presents or absence in the specified tissue was predicted with a probability in the range between 0 and 1. RNA species correctly predicted (probability  $>0.5$  for presence, and  $\leq 0.5$  for absence) were summarized using precision, recall, and F1 score metrics across 22 tissues. RNA species were further classified into four levels: high (counts  $\geq 100$ ), intermediate ( $100 > \text{counts} \geq 10$ ), low ( $10 > \text{counts} \geq 1$ ), and non-existent. The dataset split was performed randomly on the sequences, independent of chromosomes or genes.

**d**, Identical model performance comparison to Fig. 3a, but focusing on the classification of 3'-UTR abundance levels. Error bars represent mean  $\pm$  sd. Model replicates were initiated with independent random seeds,  $n=5$ .

**e**, Model performance of UltraGen variants fine-tuned with RNA species from different abundance levels. UltraGen fine-tuned variants with suffixes 'filtered\_1', 'filtered\_2', 'filtered\_5', and 'filtered\_10' denote models fine-tuned on datasets excluding RNA species from the training set with maximum abundances across 22 tissues of below 1, 2, 5, and 10 counts, respectively. The test set was also subjected to the same exclusion criteria, removing RNA species that below the defined abundance thresholds. Error bars represent mean  $\pm$  sd. The model replicates is  $n=5$ .

**f**, Length specificity of input RNA for model prediction of tissue classification. The analysis is identical to Fig. 3c, employing tandem 3'-end sequences (50 - 300 nt) with UltraGen model fine-tuned with 50 nt (top panel) and 150 nt (bottom panel) sequences. Error bands indicate sd, with  $n=5$  model replicates.

**g**, Region specificity of input RNA for model prediction of tissue classification based on transcriptome-wide random splitting (left) and chromosome-based split (right). The chromosome-based split follows the same strategy as panel g. The analyzed regions include the last 100 nt, 200-100 nt and 300-200 nt relative to the RNA 3'-end. Error bands indicate sd, with  $n=5$  model replicates.

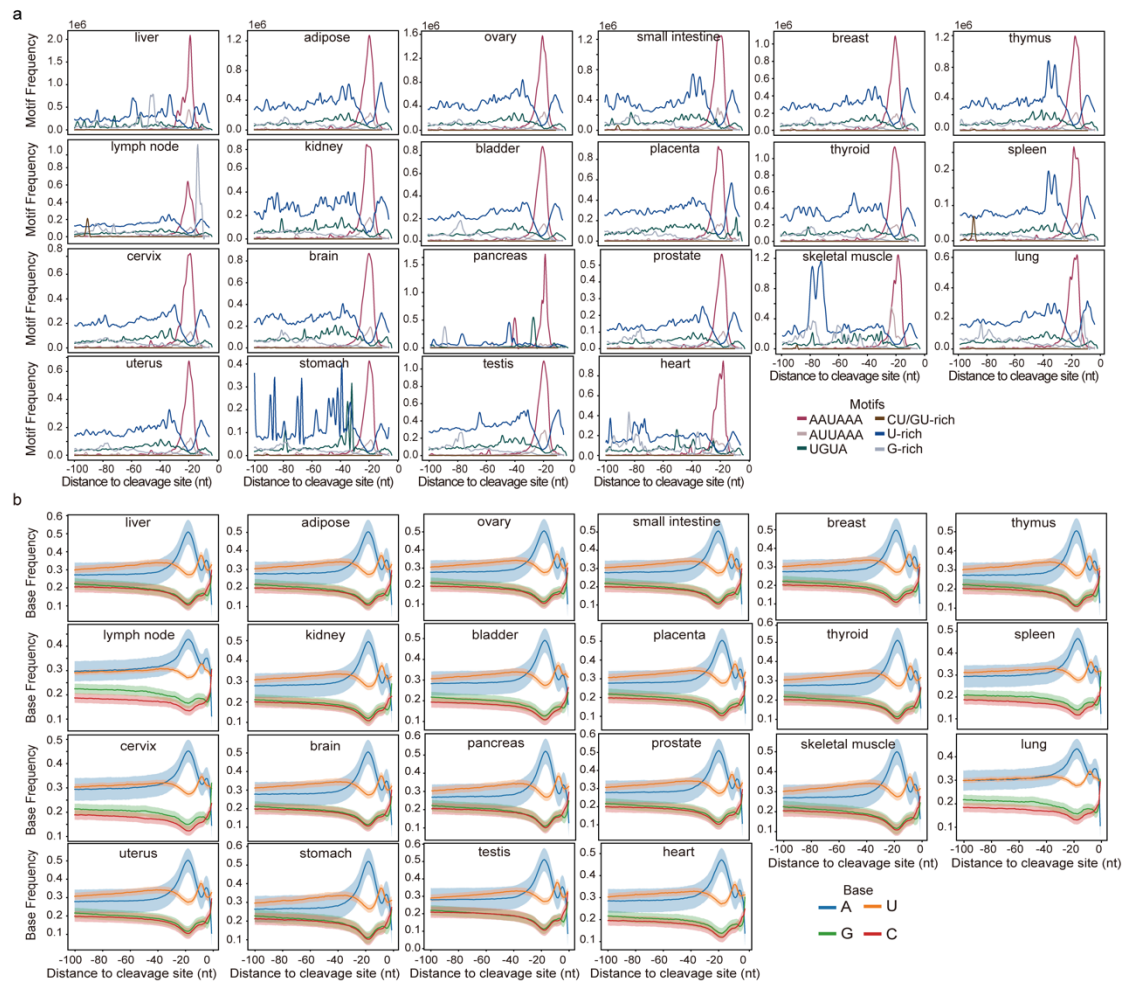

**Extended Data Fig. 4: Characterization of 3'-UTRs from human tissues.**

**a**, Distribution of polyadenylation *cis*-regulatory elements from the upstream region of the cleavage site on each individual 22 human tissues. This analysis is identical to Fig. 3e. RNA species number: liver (219477), adipose (312772), cervix (496468), brain (342821), ovary (365385), small\_intestine (378589), pancreas (155310), prostate (330919), breast (282017), thymus (217927), skeletal\_muscle (223292), lung (620713), lymph\_node (474116), kidney (416171), uterus (381253), stomach (151692), bladder (420678), placenta (320079), testis (628313), heart (346492), thyroid (343288), and spleen (313778).

**b**, Nucleotide frequency profiles for tandem 3'-end regions in tissue-specific sequences from each individual tissue. RNA species number is identical to panel a. Error band indicates sd.

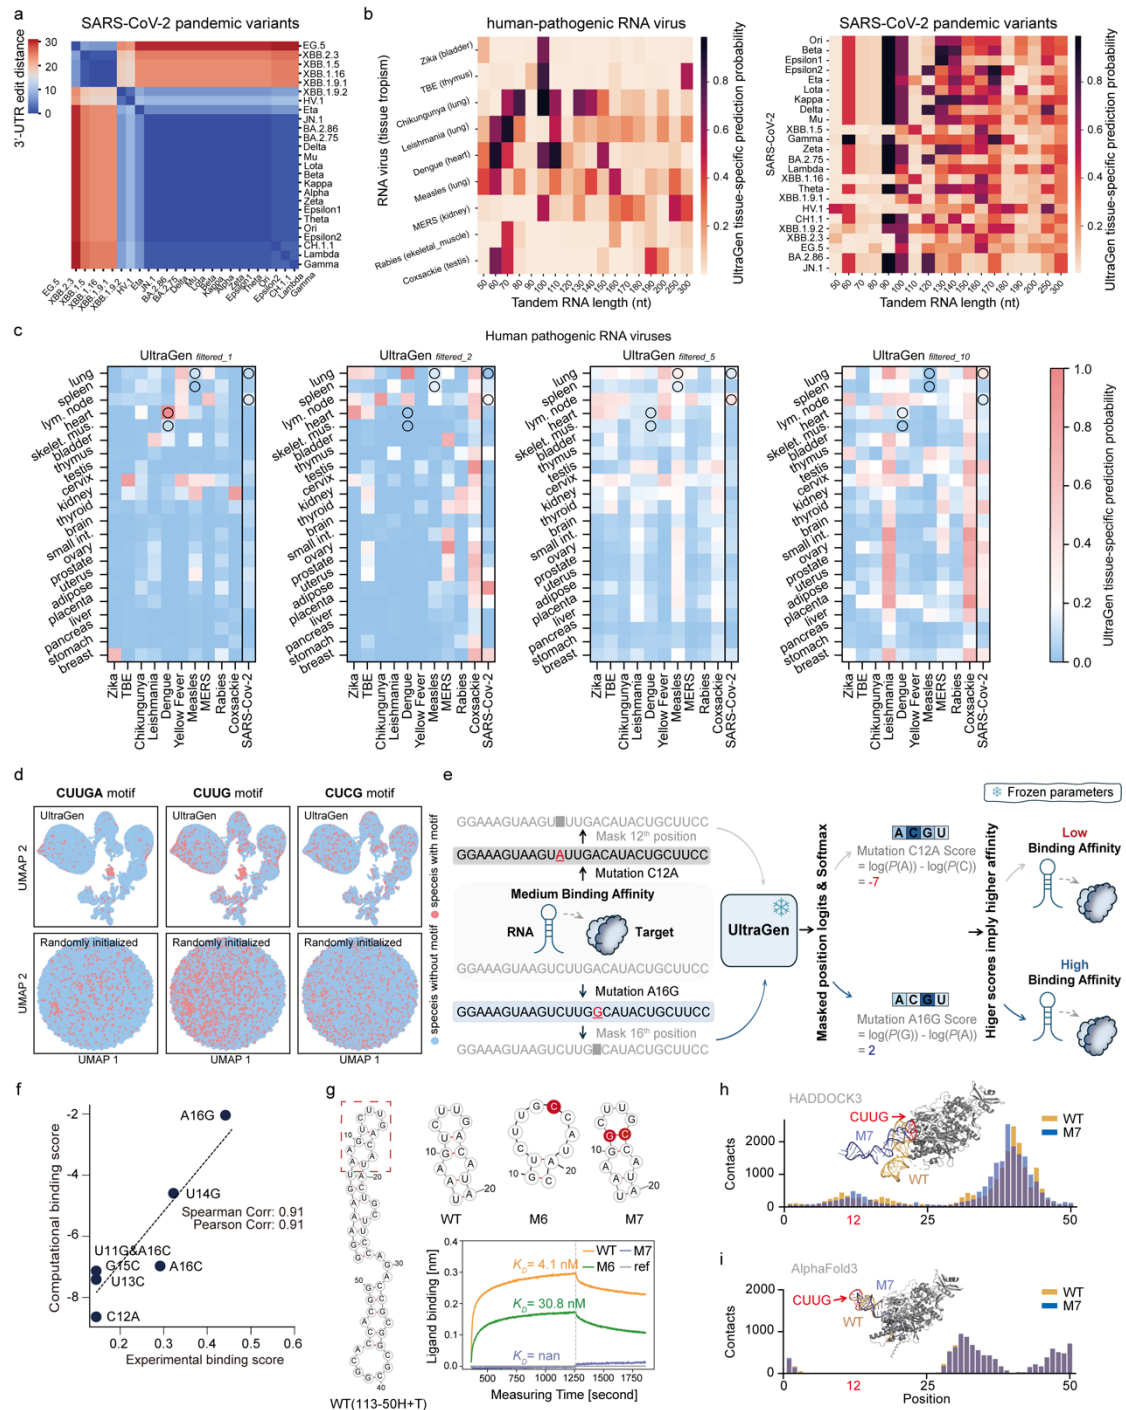

**Extended Data Fig. 5: UltraGen delineates SARS-CoV-2 replicase binding with single-base resolution.**

**a**, Evolutionarily conserved 3'-UTR of SARS-CoV-2 variants over time. The last 100 nucleotides of each 3'-UTR were compared with edit distance. At the genomic level, a mutation rate in spike (23403A>G, 6294/10022 variants) versus 3'-UTR (29870C>A, 115/10022 variants) was reported<sup>13</sup>.

**b**, Length specificity of input tandem RNA for predicting virus tropism. The analysis is identical to Fig. 3c, employing tandem 3'-end sequence from ten endogenous RNA viruses (left) and SARS-CoV-2 variants (right).

**c**, Attenuated prediction capability of tissue-specific hallmarks in human-pathogenic RNA viruses' 3'-UTRs by UltraGen variants fine-tuned with RNA species of different abundance levels. RNA virus abbreviations are consistent with Fig. 4a,b. Black circles indicate the top two RNA viruses' tropism - dengue, measles, and SARS-CoV-2 - correctly predicted by UltraGen fine-tuned with the full dataset (Supplementary Table 6). UltraGen fine-tuned variants with suffixes 'filtered\_1', 'filtered\_2', 'filtered\_5', and 'filtered\_10' denote models fine-tuned on the training dataset excluding RNA species with maximum abundances across 22 tissues of below 1, 2, 5, and 10 counts, respectively.

**d**, UMAP projections of the top one million RNA binder species from UltraSelex Nsp-B by UltraGen, colored according to the presence or absence of the denoted CUUGA, CUUG, and CUCG motifs.

**e**, UltraGen's framework for zero-shot inference on SARS-CoV-2 replicase binding. Initially, individual bases are masked. Subsequently, the framework computes the probabilities of predicting bases at the masked positions within the RNA context. This computation relies on the log ratio of the mutant base probability to the wild type base probability."

**f**, Correlation between UltraGen predicted binding score and experimental binding affinity for 'UCUUGA' motif mutation. The dashed line indicates the linear correlation trend. Two-sided.

**g**, Sequence of wild type (WT, 113-50H+T) RNA and mutants (M6, M7, with mutated bases denoted in red) for studying SARS-CoV-2 replicase binding features. RNA secondary structures were distinguished within the region outlined by a red dashed frame. The reported sequences and  $K_D$  values of M1-5 mutants<sup>1</sup> are given in Supplementary Table 8. Line plot shows the bio-layer interferometry measurement of RNA interaction with nsp12 protein. The association phase (left) and dissociates phases (right) were separated by a grey dashed line within the line plot. The reference control ("ref") indicates the detection signal in the absence of RNA during the measurement.

**h**, Molecular docking of the interaction between SARS-CoV-2 replicase subunit nsp12 protein (PDB: 7btf, chain A) and the tertiary RNA (FARFAR2 sampling). The simulated binding interface of the protein-RNA interaction results was visualized for WT (orange) and M7 (blue) RNA via PyMOL (top panel). A total of 630 interaction simulations were conducted using HADDOCK3<sup>14</sup>, including the defined individual (35) or paired (595) combination of reported RNA-interacting amino acids<sup>15</sup>. Individual RNA base-contacting amino acids within the effective distance (<10

Å) were then summed (bottom panel), using the formula  $\sum_{i=1}^n \sum_{j=1}^m \frac{10 - distance_{ij}}{10}$ . Here, " $n$ " represents the number of docking results, " $m$ " stands for the interacted amino acid residues, and " $distance_{ij}$ " denotes the minimum distance between the alpha carbon atom of the amino acid residue and any heavy atom within the RNA residue. The CUUG structural binding core was colored in red and additionally labeled with its RNA starting position 12. Similar simulation of RNA-protein contacts between WT (binding to nsp12) and M7 (not binding to nsp12) variant with the replicase was carried out.

**i**, AlphaFold3 (AF3)<sup>16</sup> predictions of the interaction between SARS-CoV-2 replicase subunit nsp12 protein (PDB: 7btf, chain A) and the tertiary RNA (FARFAR2 sampling). Total 100 web server predictions with 20 different random initiation seeds (range from 1000 to 20000, step

size 1000). The contacting amino acids of the predicted results (average pI<sub>DDT</sub> < 70, AF3 web server interpreted as “Low” confident) were calculated in the same way as in panel d. None of AF3 predictions successfully predicted the experimentally verified CUUG binding core (neither WT nor M7 RNA variant) close to the protein interface, indicating its limitation to identify the correct RNA-protein binding interface.

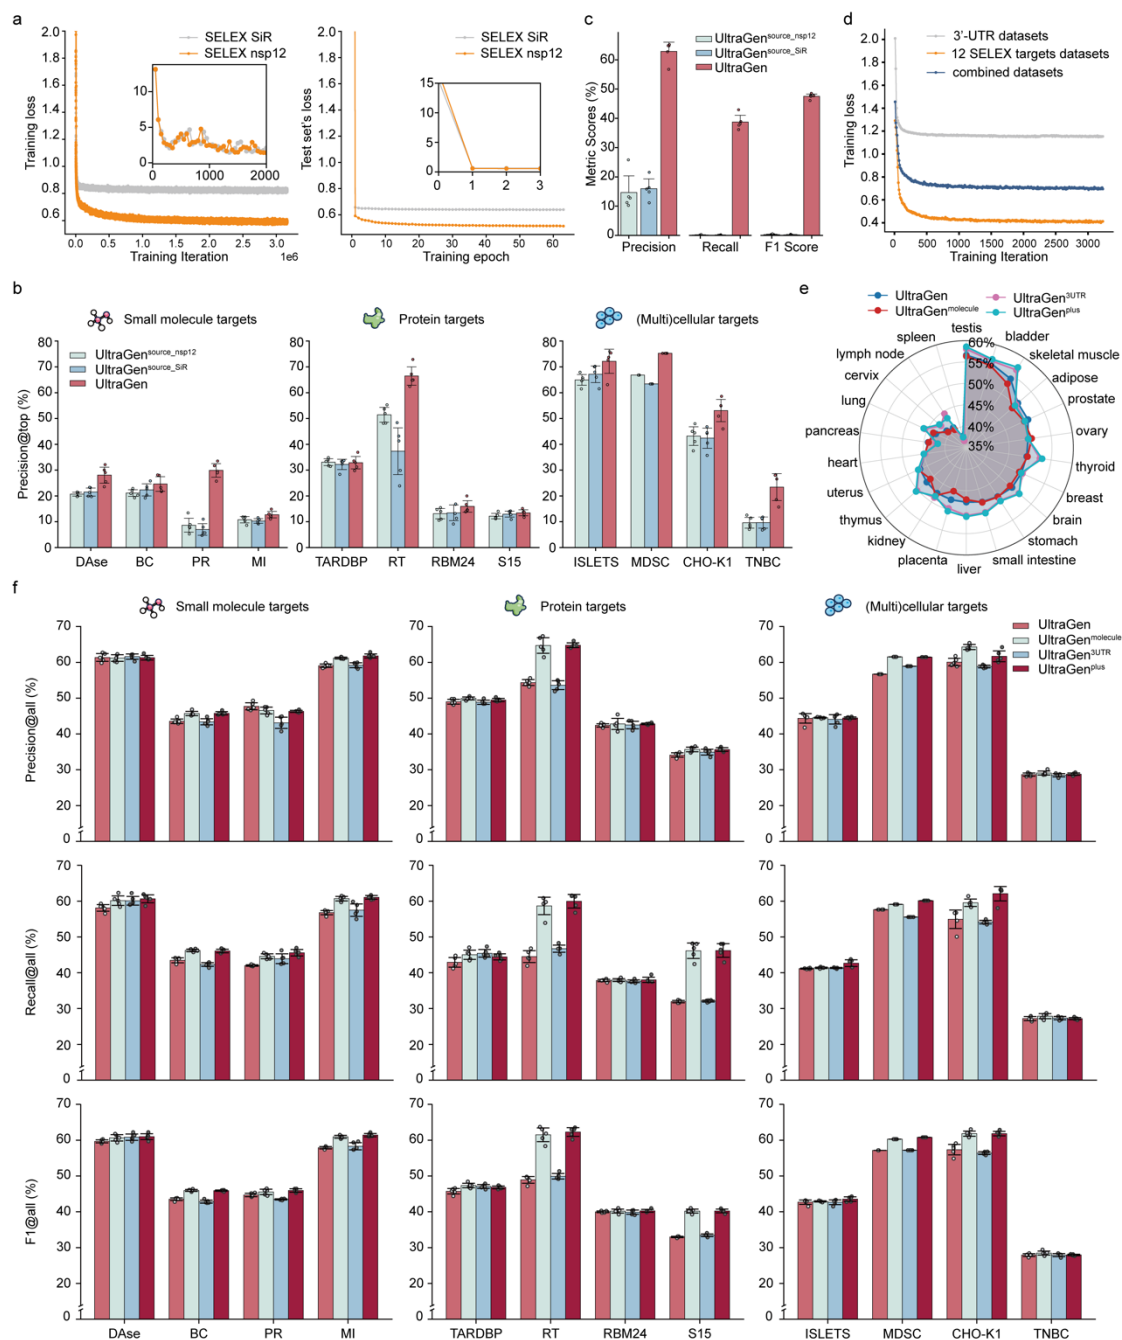

**Extended Data Fig. 6: Model performance with alternative or expanding RNA sources.**

**a**, Pre-training loss on the training (left) and test (right) sets of UltraGen<sup>source\_SiR</sup> and UltraGen<sup>source\_nsp12</sup> model throughout the learning process. Inset line plots depict the initial phase of learning loss. The held-out test set comprised 2% of the total top 10 million sequences, with less than 90% identity to the training set as determined by CD-HIT.

**b**, Ranking performance of RNA binding system to small molecule, protein, and (multi)cellular targets for UltraGen, UltraGen<sup>source\_SiR</sup>, and UltraGen<sup>source\_nsp12</sup>. The analysis is identical to the Fig. 2b. Error bars represents sd, with n=5 model replicates.

**c**, Comparison of multi-classification performance for individual 3'-UTRs across 22 human tissues by UltraGen, UltraGen<sup>source\_SiR</sup>, and UltraGen<sup>source\_nsp12</sup> model. The tissue specificity analysis is identical to Fig. 3a. Error bars represents sd, with n=5 model replicates.

**d**, Continued pre-training loss for UltraGen variants: UltraGen<sup>molecules</sup> (the twelve SELEX training dataset), UltraGen<sup>3UTR</sup> (the preliminary 3'-UTR training dataset), and UltraGen<sup>plus</sup> (combined SELEX and 3'-UTR training dataset). Each variant underwent an additional round of pre-training to minimize overfitting while retaining core memory from the base UltraGen model.

**e**, Multi-classification F1 score for tissue specificity across individual human tissue by UltraGen, UltraGen<sup>molecules</sup>, UltraGen<sup>3UTR</sup>, and UltraGen<sup>plus</sup> model.

**f**, Ranking performance on RNA binding system to small molecule, protein, and (multi)cellular targets for UltraGen, UltraGen<sup>molecules</sup>, UltraGen<sup>3UTR</sup>, and UltraGen<sup>plus</sup> model. The evaluated model metrics includes *Precision@all* (top panel), *Recall@all* (middle panel), and *F1@all* (bottom panel). The analysis is identical to Extended Data Fig. 2a-c. Error bars represent sd, with n=5 model replicates.

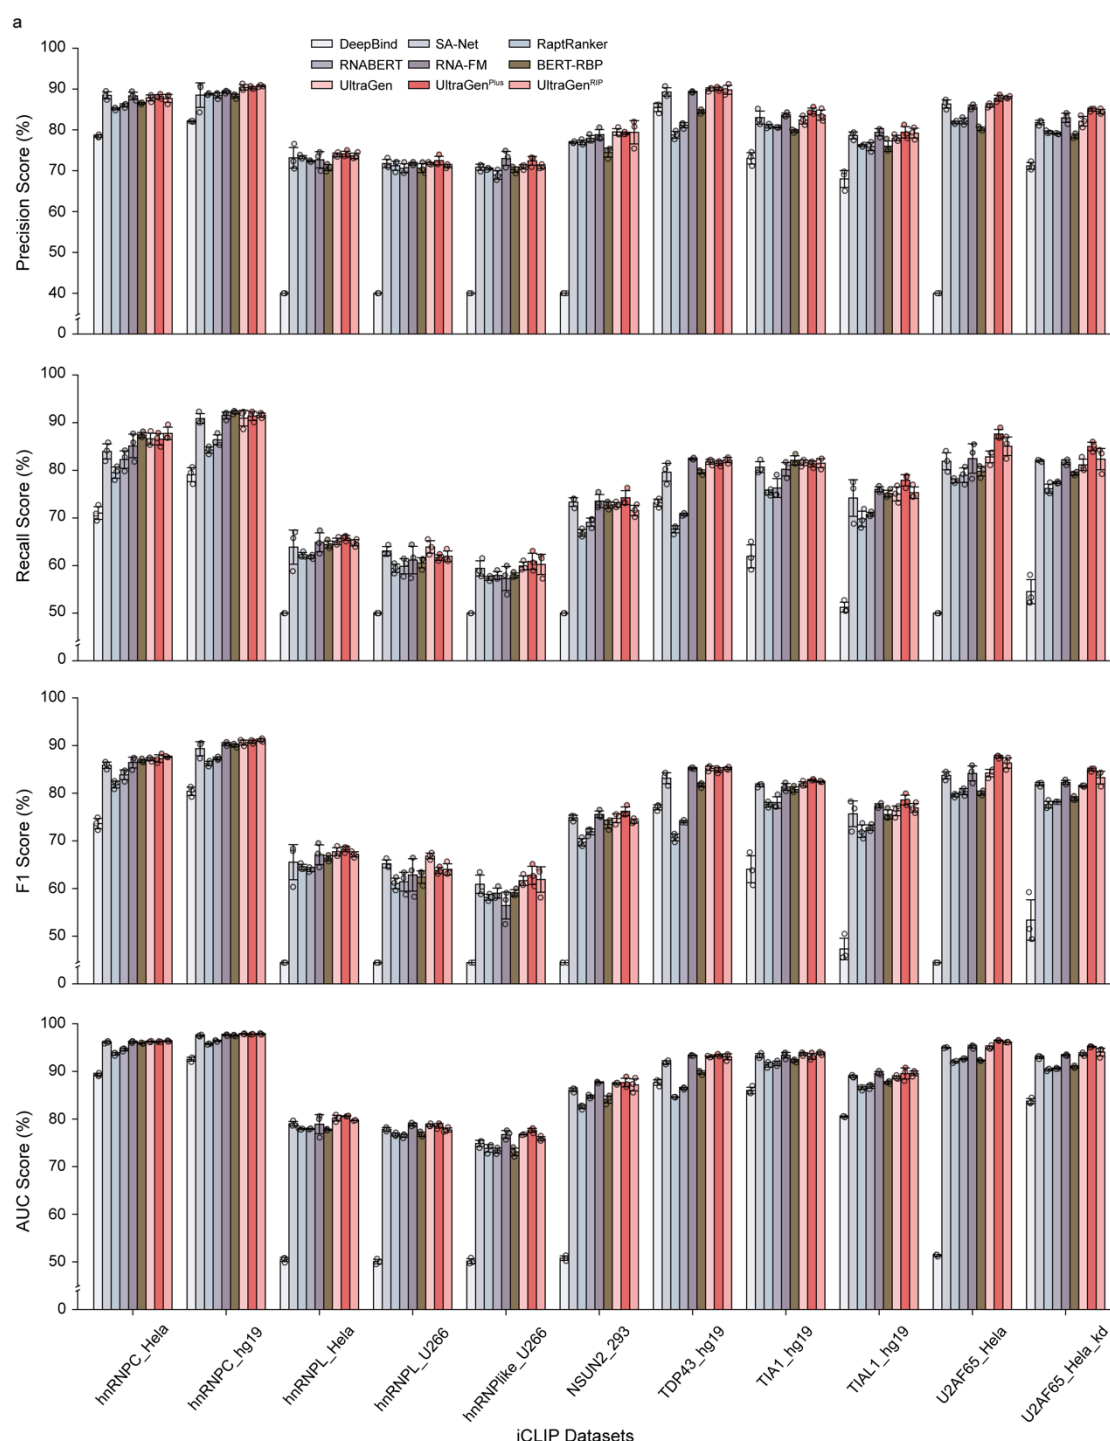

**Extended Data Fig. 7: Model performance in predicting RNA-protein interaction on the human iCLIP datasets.**

**a**, Classification performance metrics of UltraGen and other models on the *in vivo* human RNA-protein interaction iCLIP datasets. The eleven iCLIP datasets were curated and individually split into training and testing sets from the iONMF<sup>17</sup> collections. Nine protein targets, including hnRNPC<sup>18</sup>, U2AF2<sup>18</sup>, hnRNPL<sup>19</sup>, hnRNPL-like<sup>20</sup>, Nsun2<sup>21</sup>, TDP-43<sup>22</sup>, TIA1<sup>23</sup>, and TIAL1<sup>23</sup> from various cell lines, were examined. The bar height represents the mean performance across the three-fold (n=3) cross-validation, with the standard deviation (sd) indicated by error bar.

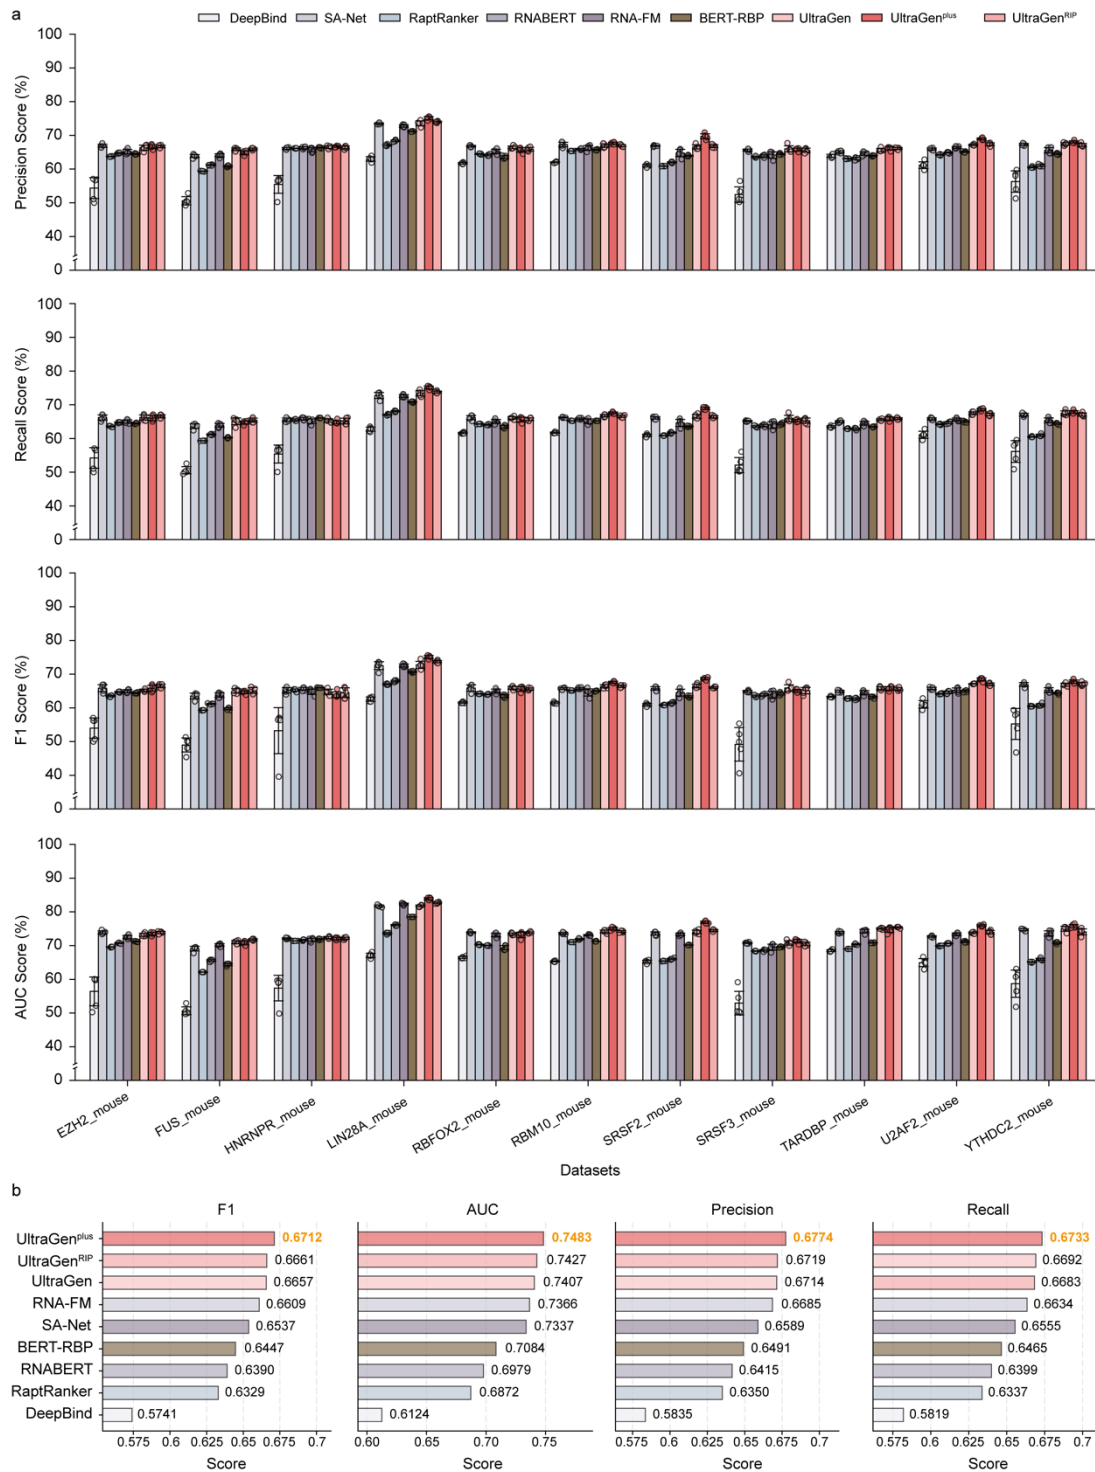

**Extended Data Fig. 8: Model performance in predicting RNA-protein interaction on the mouse CLIP datasets.**

**a**, Classification performance metrics of UltraGen and other models on the *in vivo* mouse RNA-protein interaction CLIP datasets. The positive sequences of eleven mouse protein targets, including EZH2, FUS, HNRNPR, LIN28A, RFX2, RBM10, SRSF2, SRSF3, TARDBP, and YTHDC2, were curated from the CLIPdb<sup>24</sup>, while the negative sequences were randomly sampled from transcriptome without overlap with positive sequence. The bar height represents the mean performance (n=5), with the standard deviation (sd) indicated by error bar.

231 **b**, Comparison of mouse RNA-protein interactions binary classification from the CLIP  
232 datasets between UltraGen variants and other models. The average performance metrics  
233 across the eleven CLIP datasets from panel a are presented.  
234

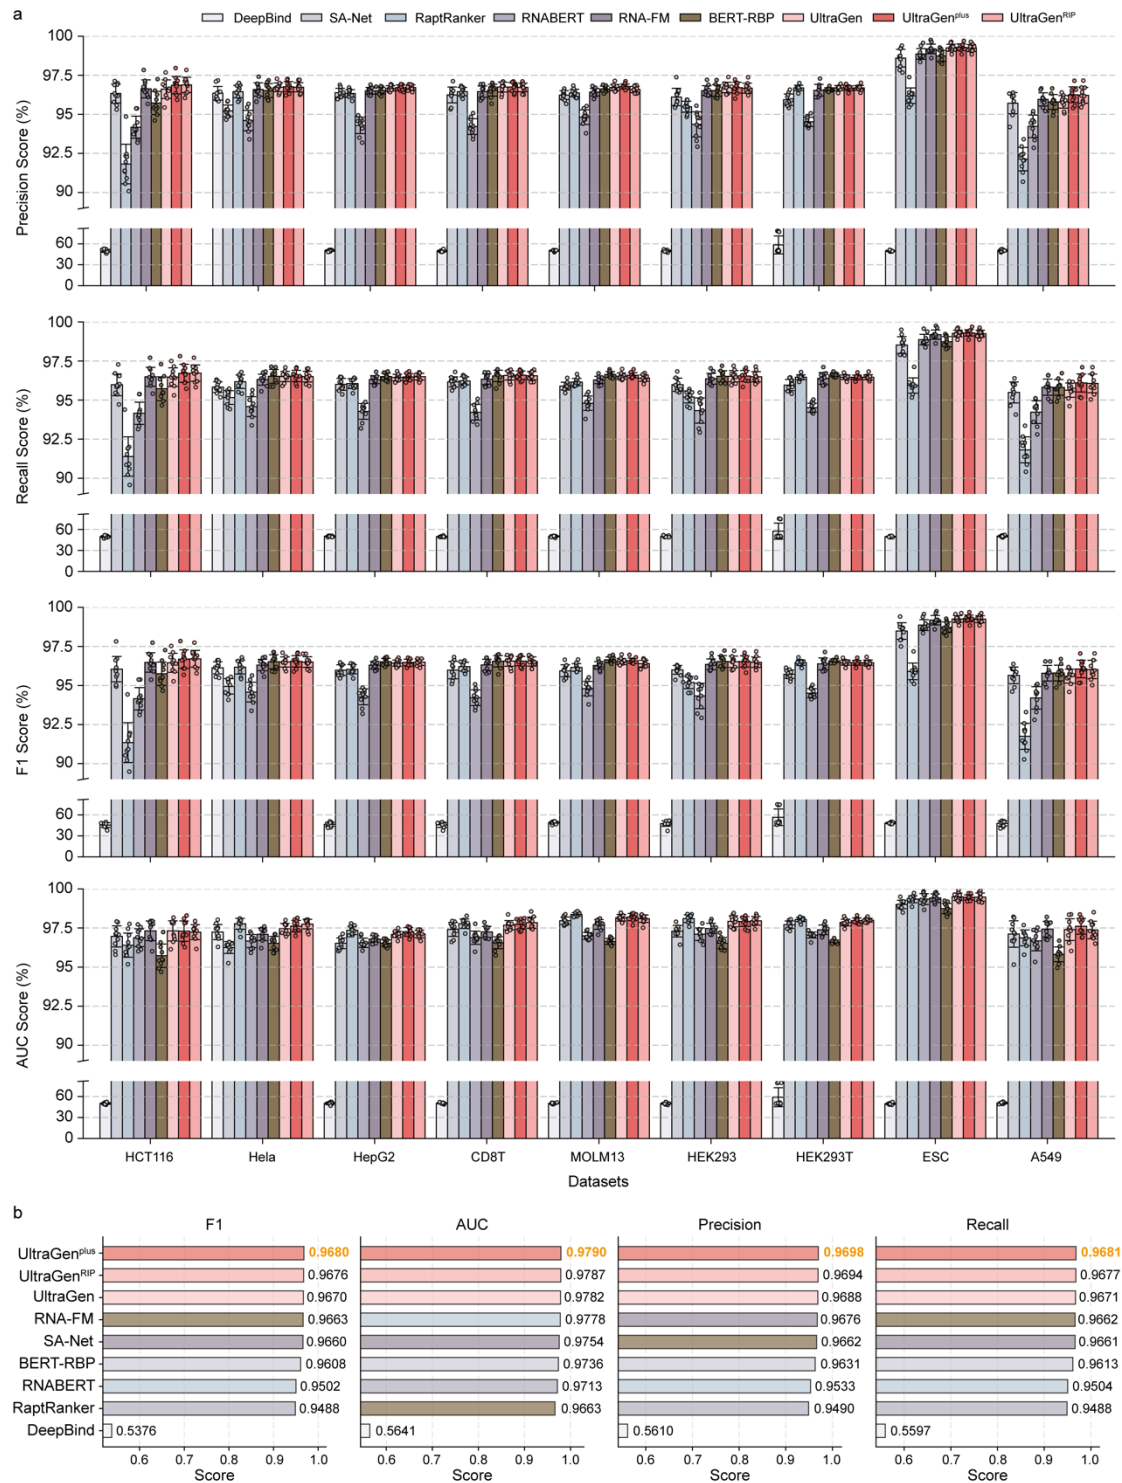

**Extended Data Fig. 9: Model performance in predicting human m6A methylation.**

**a**, Classification performance metrics of UltraGen and other models on the *in vivo* RNA m6A methylation datasets. A total of non-redundant 79,021 m6A modification site (filtered from m6A-altas 131,703 raw signals<sup>25</sup>) and 849,005 non-m6A sites, along with their flanking 20-nt upstream and 20-nt downstream regions, from nine cell lines were obtained from a previous study<sup>26</sup>. The bar height represents the mean performance (n=5), with the standard deviation (sd) indicated by error bar.

243 **b**, Comparison of RNA m6A methylation binary classification from the CLIP datasets between  
244 UltraGen variants and other models. The average performance metrics across the nine  
245 datasets from panel a are presented.  
246

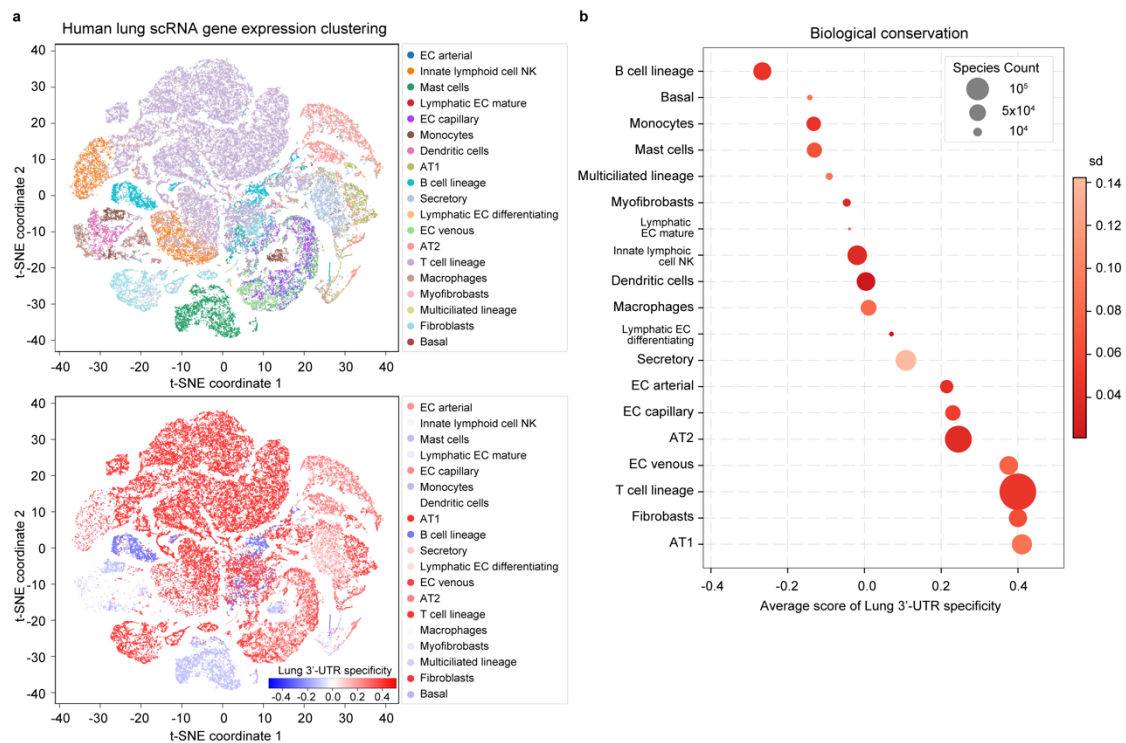

**Extended Data Fig. 10: Mapping of single-cell 3' readout RNA sequencing of human lung adenocarcinoma by UltraGen.**

**a**, t-SNE projections of human lung adenocarcinoma (LUAD) cells (top panel, expression level based) with annotated lung 3'-UTR specificity (bottom panel, tandem RNA based). Five single cell 3' readout RNA sequencing dataset of primary lung tissues were analyzed. The tissue specificity of RNA species, based on their tandem 100 nt sequences extracted from their mapped loci, was predicted using the UltraGen model. Clustered cells were annotated with the average logistic regression coefficient of five biological samples, with high predicted values indicating lung tissue specificity (the highest classification to lung or probability (range 0-1) above 0.9). Abbreviation, EC (Endothelial cells) and AT (Alveolar type cells).

**b**, Conservation of lung specific 3'-UTR in alveolar type cells associated with LUAD. Alveolar type II<sup>27</sup> and I<sup>28</sup> cells are highly involved in LUAD progression. The bubble size denotes the number of RNA species for the analysis, and the variance between the five biological replicates is color-coded in red.

**Supplementary Table 1. Model ranking criteria for SiR-binding RNA systems.**

| Dataset                  | Metrics        | Category A      | Category B         | Category C          | Category D          | Category E           | Category F          |
|--------------------------|----------------|-----------------|--------------------|---------------------|---------------------|----------------------|---------------------|
| UltraSelex SiR-B (whole) | Top Rank*      | 0.01%           | 0.01-0.05%         | 0.05-0.1%           | 0.1-0.5%            | 0.5-1%               | 1-100%              |
|                          | RNA Species    | 5,456           | 21,828             | 27,285              | 218,276             | 272,845              | 54,023,358          |
|                          | Random Sample  | 5,456           | 21,828             | 27,285              | 100,000             | 100,000              | 100,000             |
|                          | Train/Val/Test | 3,295/589/1,572 | 13,101/2,106/6,621 | 16,422/2,727/8,136  | 60,045/9,907/3,0048 | 59,831/10,175/2,9994 | 60,047/9,953/30,000 |
| SELEX SiR (whole)        | Top Rank**     | 1%              | 1-5%               | 5-12%               | 12%-100%            | Background           | —                   |
|                          | Enrichment     | ≥47             | [7, 47)            | [3, 7)              | [1, 3)              | 0                    | —                   |
|                          | RNA Species    | 7,793           | 32,290             | 52,699              | 688,150             | 13,800,896           | —                   |
|                          | Random Sample  | 7,793           | 32,290             | 52,699              | 100,000             | 100,000              | —                   |
|                          | Train/Val/Test | 4,722/750/2,321 | 19,320/3,332/9,638 | 31,715/5,286/15,698 | 59,829/9,936/30,235 | 60,083/9,974/29,943  | —                   |
| SELEX SiR (exclusive)    | Top Rank**     | 0.5%            | 0.5-1%             | 1-5%                | 5-16%               | 16-100%              | Background          |
|                          | Enrichment     | ≥37             | [19, 37)           | [5, 19)             | [2, 5)              | 1                    | 0                   |
|                          | RNA Species    | 3,561           | 3,842              | 24,862              | 82,213              | 594,381              | 13,752,210          |
|                          | Random Sample  | 3,561           | 3,842              | 24,862              | 82,213              | 100,000              | 100,000             |
|                          | Train/Val/Test | 2,134/343/1,084 | 2,328/382/1,132    | 14,868/2,461/7,533  | 49,532/8,232/24,449 | 59,852/10,112/3,036  | 59,972/9,918/30,110 |

\* UltraSelex SiR-B RNA species were sorted in a descending order based on SGREELI *auc* values.

\*\*SELEX SiR RNA species were sorted based on their detected enrichment in the final round (the 14<sup>th</sup>).

Background indicates no detection of these RNA species in the final selection round.

**Supplementary Table 2. Summary of twelve benchmark RNA SELEX systems and their high-throughput sequencing libraries.**

| Target                    | Name                                                                                 | Dataset | Method        | Total rounds | Sequenced rounds                  | # of species | Length (nt) | PMID     |
|---------------------------|--------------------------------------------------------------------------------------|---------|---------------|--------------|-----------------------------------|--------------|-------------|----------|
| Small molecules           | Benzopyrylium-coumarin fluorophores                                                  | BC      | SELEX         | 11           | 1-11                              | 65,299,912   | 98-106      | 34309994 |
|                           | Paromomycin                                                                          | PR      | Capture-SELEX | 11           | 0-11                              | 15,234,700   | 119-125     | 30957848 |
|                           | Maleimide involved in Diels-Alderase Mechanistic inhibitor of serine proteases PPACK | DAse    | SELEX         | 10           | 1-10                              | 323,414      | 152-162     | 24157838 |
|                           |                                                                                      | MI      | SELEX         | 14           | 1-14                              | 555,707      | 228-238     | 24157838 |
| Proteins                  | TAR DNA binding protein 43                                                           | TARDBP  | HTR-SELEX     | 4            | 1-4                               | 1,019,953    | 109         | 32703884 |
|                           | Ribosomal protein S15                                                                | S15     | SELEX         | 11           | 11                                | 1,585,543    | 87          | 28587636 |
|                           | RNA-binding motif protein 24                                                         | RBM24   | HTR-SELEX     | 4            | 1-4                               | 749,249      | 109         | 32703884 |
|                           | HIV-1 reverse transcriptase                                                          | RT      | SELEX         | 15           | 15                                | 62,444       | 115-121     | 23385524 |
| Multi(cellular) molecules | Triple-negative breast cancer cells                                                  | TNBC    | Cell-SELEX    | 14           | 0, 3, 5, 8, 9, 10, 11, 12, 13, 14 | 45,922,615   | 84          | 32222697 |
|                           | Chinese hamster ovary K1 cells                                                       | CHO-K1  | Cell-SELEX    | 15           | 0-15                              | 8,432,785    | 94-99       | 29982617 |
|                           | Myeloid-derived suppressor cells                                                     | MDSC    | Cell-SELEX    | 11           | 1,6,10,11                         | 15,297,461   | 74-78       | 32554710 |
|                           | Human islets                                                                         | ISLETS  | Tissue-SELEX  | 8            | 1-8                               | 89,694,683   | 80-84       | 35383192 |

**Supplementary Table 3. Model ranking criteria for RNA SELEX systems with small-molecule targets.**

| Datas<br>et | Metrics            | Category A             | Category B              | Category C               | Category D               | Category E              |
|-------------|--------------------|------------------------|-------------------------|--------------------------|--------------------------|-------------------------|
| BC          | Top rank*          | 1%                     | 1-5%                    | 5-15%                    | 15-100%                  | Background              |
|             | Enrichment         | ≥20                    | [4, 20)                 | [2, 4)                   | 1                        | 0                       |
|             | RNA species        | 22,034                 | 97,948                  | 200,504                  | 1,829,680                | 63,149,746              |
|             | Random Sample      | 22,034                 | 97,948                  | 100,000                  | 100,000                  | 100,000                 |
|             | Train/Val/T<br>est | 13,213/2,191/6<br>,630 | 58,790/9,828/29<br>,330 | 59,936/10,038/30<br>,026 | 59,970/9,959/30,<br>071  | 60,080/9,982/29<br>,938 |
| PR          | Top rank*          | 1%                     | 1-5%                    | 5-10%                    | 10-100%                  | Background              |
|             | Enrichment         | ≥50                    | [7, 50)                 | [3, 7)                   | [1, 3)                   | 0                       |
|             | RNA species        | 1,410                  | 5,714                   | 9,060                    | 124,388                  | 15,094,128              |
|             | Random Sample      | 1,410                  | 5,714                   | 9,060                    | 100,000                  | 100,000                 |
|             | Train/Val/T<br>est | 853/135/422            | 3,451/619/1,644         | 5,407/914/2,739          | 60,017/10,031/29<br>,952 | 59,982/9,919/30<br>,099 |
| DAse        | Top rank*          | 20%                    | 20-100%                 | Background               | —                        | —                       |
|             | Enrichment         | ≥2                     | 1                       | 0                        | —                        | —                       |
|             | RNA species        | 1,720                  | 6,863                   | 314,831                  | —                        | —                       |
|             | Random Sample      | 1,720                  | 6,863                   | 100,000                  | —                        | —                       |
|             | Train/Val/T<br>est | 1,020/164/536          | 4,152/652/2,059         | 59,977/10,042/29<br>,981 | —                        | —                       |
| MI          | Top rank*          | 3%                     | 3-100%                  | Background               | —                        | —                       |
|             | Enrichment         | ≥2                     | 1                       | 0                        | —                        | —                       |
|             | RNA species        | 924                    | 33,635                  | 521,148                  | —                        | —                       |
|             | Random Sample      | 924                    | 33,635                  | 100,000                  | —                        | —                       |
|             | Train/Val/T<br>est | 542/83/299             | 20,173/3,317/10<br>,145 | 60,020/10,056/29<br>,924 | —                        | —                       |

\* SELEX RNA species were sorted based on their detected enrichment in the final SELEX round.

Background indicates no detection of these RNA species in the final selection round.

**Supplementary Table 4. Model ranking criterial for RNA SELEX systems with protein targets.**

| Dataset | Metrics        | Category A      | Category B          | Category C           | Category D           | Category E          |
|---------|----------------|-----------------|---------------------|----------------------|----------------------|---------------------|
| TARDBP  | Top rank*      | 4%              | 4-12%               | 12-100%              | Background           | —                   |
|         | Enrichment     | ≥3              | [2, 3)              | [1, 2)               | 0                    | —                   |
|         | RNA species    | 7,985           | 13,314              | 162,401              | 836,253              | —                   |
|         | Random Sample  | 7,985           | 13,314              | 100,000              | 100,000              | —                   |
|         | Train/Val/Test | 4,814/775/2,396 | 8,026/1,358/3,930   | 60,021/9,909/30,070  | 59,918/10,088/29,994 | —                   |
| S15     | Top rank*      | 1%              | 1-5%                | 5-11%                | 11-100%              | —                   |
|         | Enrichment     | ≥38             | [6, 38)             | [3, 6)               | [1, 3)               | —                   |
|         | RNA species    | 6,720           | 68,956              | 99,348               | 1,410,519            | —                   |
|         | Random Sample  | 6,720           | 68,956              | 99,348               | 100,000              | —                   |
|         | Train/Val/Test | 4,059/721/1,940 | 41,289/6,882/20,785 | 59,779/9,863/29,706  | 59,887/10,036/30,077 | —                   |
| RBM24   | Top rank*      | 1%              | 1-6%                | 6-100%               | Background           | —                   |
|         | Enrichment     | ≥3              | [2, 3)              | [1, 2)               | 0                    | —                   |
|         | RNA species    | 2,365           | 8,226               | 170,684              | 567,974              | —                   |
|         | Random Sample  | 2,365           | 8,226               | 100,000              | 100,000              | —                   |
|         | Train/Val/Test | 1,420/229/716   | 4,946/833/2,447     | 60,034/10,056/29,910 | 59,954/9,941/30,105  | —                   |
| RT      | Top rank*      | 1%              | 1-5%                | 5-10%                | 10-31%               | 31-100%             |
|         | Enrichment     | ≥153            | [17, 153)           | [6, 17)              | [2, 6)               | [1, 2)              |
|         | RNA species    | 625             | 2,496               | 3,783                | 13,340               | 42,200              |
|         | Random Sample  | 625             | 2,496               | 3,783                | 13,340               | 42,200              |
|         | Train/Val/Test | 372/63/190      | 1,480/247/769       | 2,294/341/1,148      | 7,989/1,347/4,004    | 25,331/4,246/12,623 |

\* SELEX RNA species were sorted based on their detected enrichment in the final SELEX round.  
Background indicates no detection of these RNA species in the final selection round.

**Supplementary Table 5. Model ranking criteria for RNA SELEX systems with (multi)cellular targets.**

| Data set | Metrics        | Category A        | Category B          | Category C           | Category D           | Category E           | Category F          | Category G          |
|----------|----------------|-------------------|---------------------|----------------------|----------------------|----------------------|---------------------|---------------------|
| TN BC    | Top rank*      | 0.1%              | 0.1-0.5%            | 0.5-1%               | 1-5%                 | 5-9%                 | 9-100%              | Background          |
|          | Enrichment     | ≥115              | [26, 115)           | [14, 26)             | [5, 14)              | [4, 5)               | [1, 4)              | 0                   |
|          | RNA species    | 1,711             | 6,931               | 9,455                | 64,549               | 70,968               | 1,547,821           | 44,221,180          |
|          | Random Sample  | 1,711             | 6,931               | 9,455                | 64,549               | 70,968               | 100,000             | 100,000             |
|          | Train/Val/Test | 1,025/164/522     | 4,181/703/2047      | 5,663/965/2,827      | 38,800/6,547/19,202  | 42,615/7060/21,293   | 59,805/9995/30,200  | 60,079/9,927/29,994 |
| CH O-K1  | Top rank*      | 1%                | 1-5%                | 5-12%                | 12-100%              | Background           | —                   | —                   |
|          | Enrichment     | ≥32               | [4, 32)             | [2, 4)               | [1, 2)               | 0                    | —                   | —                   |
|          | RNA species    | 1,250             | 5,432               | 8,561                | 108,438              | 8,309,104            | —                   | —                   |
|          | Random Sample  | 1,250             | 5,432               | 8,561                | 100,000              | 100,000              | —                   | —                   |
|          | Train/Val/Test | 753/120/377       | 3,287/535/1,610     | 5,116/820/2,625      | 60,059/9,964/29,977  | 59,930/10,085/29,985 | —                   | —                   |
| MD SC    | Top rank*      | 0.1%              | 0.1-0.5%            | 0.5-1%               | 1-5%                 | 5-10%                | 10-100%             | Background          |
|          | Enrichment     | ≥165              | [30, 165)           | [14, 30)             | [3, 14)              | [2, 3)               | [1, 2)              | 0                   |
|          | RNA species    | 3,642             | 14,698              | 19,087               | 158,808              | 161,512              | 3,277,166           | 11,662,548          |
|          | Random Sample  | 3,642             | 14,698              | 19,087               | 100,000              | 100,000              | 100,000             | 100,000             |
|          | Train/Val/Test | 2,226/368/1,048   | 8,751/1,498/4,449   | 11,465/1,907/5,715   | 59,948/9,918/30,134  | 59,939/10,059/30,002 | 60,094/9,984/29,922 | 60,033/1,008/29,959 |
| ISL ETS  | Top rank*      | 0.1%              | 0.1-2%              | 2-100%               | Background           | —                    | —                   | —                   |
|          | Enrichment     | ≥3                | [2, 3)              | [1, 2)               | 0                    | —                    | —                   | —                   |
|          | RNA species    | 13,599            | 373,679             | 17,547,704           | 71,759,701           | —                    | —                   | —                   |
|          | Random Sample  | 13,599            | 100,000             | 100,000              | 100,000              | —                    | —                   | —                   |
|          | Train/Val/Test | 8,206/1,319/4,074 | 60,155/9,864/29,981 | 59,858/10,048/30,094 | 59,940/10,129/29,931 | —                    | —                   | —                   |

\* SELEX RNA species were sorted based on their detected enrichment in the final SELEX round. Background indicates no detection of these RNA species in the final selection round.

**Supplementary Table 6. Summary of sequence usage for UltraGen and relevant variants fine-tuned with tandem 3'-UTR RNA species from 22 human tissues.**

| UltraGen Variants | Train species | Eval species | Test species | Total     | Percentage |
|-------------------|---------------|--------------|--------------|-----------|------------|
| Full*             | 1,688,633     | 361,168      | 844,317      | 2,894,118 | 100%       |
| Filtered_1**      | 1,030,127     | 218,650      | 514,684      | 1,716,472 | 60.92%     |
| Filtered_2**      | 757,708       | 160,587      | 378,635      | 1,262,869 | 44.81%     |
| Filtered_5**      | 417,312       | 88,356       | 208,635      | 695,787   | 24.68%     |
| Filtered_10**     | 230,537       | 48,708       | 115,191      | 384,160   | 13.63%     |

\* A full collection of tandem 3'-terminal end sequencing data across 22 human tissues obtained from APADB was segregated into training, validation, and test sets with an approximate 6:1:3 distribution.

\*\* The training, validation, and testing sets underwent progressive filtering using four abundance cutoffs (>1, >2, >5, and >10), where sequences were retained only if their maximum abundance across 22 tissues exceeded the respective threshold.

**Supplementary Table 7. Summary of human-pathogenic RNA viruses and their tissue-specific inference.**

| Name                                                 | Abbreviation | Accession ID | PolyA length | 3'-UTR* | Tissue top2 prediction | Tissue literature (PMID) |
|------------------------------------------------------|--------------|--------------|--------------|---------|------------------------|--------------------------|
| Zika virus                                           | Zika         | NC_012532.1  | 0            | 100     | bladder, lymph node    | 29494684                 |
| Tick-borne encephalitis virus                        | TBE          | NC_001672.1  | 0            | 100     | thymus, bladder        | 2389567, 36205381        |
| Chikungunya virus                                    | Chikungunya  | NC_004162.2  | 0            | 100     | lung, lymph node       | 36016408                 |
| Leishmania RNA virus 1 - 1                           | Leishmania   | NC_002063.1  | 0            | 36      | lung, spleen           | 31999729                 |
| Dengue virus 1                                       | Dengue       | NC_001477.1  | 0            | 100     | heart, skeletal muscle | 20032806                 |
| Yellow fever virus                                   | Yellow Fever | NC_002031.1  | 0            | 100     | lymph node, spleen     | 30134625, 25412185       |
| Measles virus                                        | Measles      | NC_001498.1  | 0            | 97      | lung, spleen           | 17715217, 10490102       |
| Middle East respiratory syndrome-related coronavirus | MERS         | NC_019843.3  | 12           | 100     | kidney, spleen         | 31668197, 26203058       |
| Rabies virus                                         | Rabies       | NC_001542.1  | 0            | 74      | skeletal muscle, heart | 4282379, 33738007        |
| Human coxsackievirus A2 strain Fleetwood             | Coxsackie    | NC_038306.1  | 0            | 71      | testis, thyroid        | 33102086, 35909527       |

\* The length of sequence from the end of the 3'-UTR that was utilized for model prediction.

**Supplementary Table 8. Summary of SARS-CoV-2 variants for tissue-specific inference.**

| Name                       | Lineage   | Accession ID | PolyA length | 3'-UTR* |
|----------------------------|-----------|--------------|--------------|---------|
| Ori                        | B         | NC_045512.2  | 33           | 100     |
| Epsilon2                   | B.1.429   | MZ722827.1   | 33           | 100     |
| Zeta                       | P.3       | OL981152.1   | 33           | 100     |
| Epsilon1                   | B.1.427   | OK245663.1   | 33           | 100     |
| Theta                      | P.2       | MZ169917.1   | 33           | 100     |
| Eta                        | B.1.525   | MW791296.1   | 33           | 100     |
| Lambda                     | C.37      | MW937858.1   | 33           | 100     |
| Gamma                      | P.1       | OP855417.1   | 33           | 100     |
| Alpha                      | B.1.1.7   | OX590588.1   | 33           | 100     |
| Kappa                      | B.1.617.1 | OK246830.1   | 33           | 100     |
| Beta                       | B.1.351   | OK246830.1   | 33           | 100     |
| Lota                       | B.1.526   | OK246905.1   | 33           | 100     |
| Mu                         | B.1.621   | MZ411658.1   | 33           | 100     |
| Delta                      | B.1.617.2 | OR129998.1   | 33           | 100     |
| Omicron_multiple           | BA.2.75   | OP998291.1   | 33           | 100     |
| Omicron_XBB_1.16_multiple  | XBB.1.16  | BS007362.1   | 21           | 100     |
| Omicron_CH1.1_multiple     | CH.1.1    | OR180688.1   | 33           | 100     |
| Omicron_XBB_1.9.1_multiple | XBB.1.9.1 | BS007360.1   | 21           | 100     |
| Omicron_XBB_1.5_multiple   | XBB.1.5   | BS007567.1   | 21           | 100     |
| Omicron_XBB_1.9.2_multiple | XBB.1.9.2 | BS007596.1   | 30           | 100     |
| Omicron_XBB_2.3_multiple   | XBB.2.3   | BS007565.1   | 21           | 100     |
| BA.2.86_multiple           | BA.2.86   | OR558991.1   | 33           | 100     |
| Omicron_EG.5_multiple      | EG.5      | BS007694.1   | 24           | 100     |
| HV.1                       | HV.1      | OR815854.1   | 29           | 100     |
| JN.1                       | JN.1      | OR815892.1   | 33           | 100     |

\* The length of the sequence from the end of 3'-UTR that was utilized for model prediction.

**Supplementary Table 9. Consistence between experimental and computational methods for nsp12 RNA binding.**

| 113-50H+L | Mutation  | $K_D$ (nM)            | Experimental binding* | Computational binding** | RNA Sequence                                                             |
|-----------|-----------|-----------------------|-----------------------|-------------------------|--------------------------------------------------------------------------|
| WT        | —         | 4.1                   | —                     | —                       | GGAAAGUAAGUCUUGACAUACUGCUUCCAGACCGCGGCGGCGCAC<br>CACGG                   |
| M1        | C12A      | no binding<br>(>1000) | 0.1448                | -8.6362                 | GGAAAGUAAGU <u>A</u> UUGACAUACUGCUUCCAGACCGCGGCGGCGCAC<br>CACGG          |
| M2        | U13C      | no binding<br>(>1000) | 0.1448                | -7.4149                 | GGAAAGUAAGUC <u>C</u> UGACAUACUGCUUCCAGACCGCGGCGGCGCAC<br>CACGG          |
| M3        | U14C      | 22.2                  | 0.3226                | -4.5929                 | GGAAAGUAAGUCU <u>C</u> GACAUACUGCUUCCAGACCGCGGCGGCGCAC<br>CACGG          |
| M4        | G15C      | no binding<br>(>1000) | 0.1448                | -7.4056                 | GGAAAGUAAGUCU <u>C</u> ACAUACUGCUUCCAGACCGCGGCGGCGCAC<br>CACGG           |
| M5        | A16G      | 9.6                   | 0.4421                | -2.0393                 | GGAAAGUAAGUCUUG <u>G</u> CAUACUGCUUCCAGACCGCGGCGGCGCAC<br>CACGG          |
| M6        | A16C      | 30.8                  | 0.2918                | -6.9735                 | GGAAAGUAAGUCUUG <u>C</u> CAUACUGCUUCCAGACCGCGGCGGCGCAC<br>CACGG          |
| M7        | U11G&A16C | no binding<br>(>1000) | 0.1448                | -7.1336                 | GGAAAGUAAG <u>G</u> CUUG <u>C</u> CAUACUGCUUCCAGACCGCGGCGGCGCAC<br>CACGG |

\* Experimental binding scores were calculated as  $1/\ln(K_D)$ .

\*\* Computational binding scores, with higher values indicating greater binding potential, were predicted by UltraGen.

**Supplementary Table 10. Summary of human iCLIP sequencing datasets**

| Dataset*         | Target Protein | Tissue | Protocol | PMID     | Data file name                                                                                                                           |
|------------------|----------------|--------|----------|----------|------------------------------------------------------------------------------------------------------------------------------------------|
| hnRNPC_Hela      | hnRNPC         | HeLa   | iCLIP    | 23374342 | ICLIP_hnRNPC_Hela_iCLIP_all_clusters.bedGraph.gz                                                                                         |
| hnRNPC_hg19      | hnRNPC         | HeLa   | iCLIP    | 24184352 | ICLIP_HNRNPC_hg19.bedGraph.gz                                                                                                            |
| hnRNPL_Hela      | hnRNPL         | HeLa   | iCLIP    | 24526010 | ICLIP_hnRNPL_Hela_group_3975_all-hnRNPL-Hela-hg19_sum_G_hg19-ensembl59_from_2337-2339-741_bedGraph-cDNAhits-in-genome.bedGraph.gz        |
| hnRNPL_U266      | hnRNPL         | U266   | iCLIP    | 24526010 | ICLIP_hnRNPL_U266_group_3986_all-hnRNPL-U266-hg19_sum_G_hg19-ensembl59_from_2485_bedGraph-cDNA-hits-in-genome.bedGraph.gz                |
| hnRNPl like_U266 | hnRNPL-like    | U266   | iCLIP    | 24526010 | ICLIP_hnRNPl like_U266_group_4000_all-hnRNPl like-U266-hg19_sum_G_hg19-ensembl59_from_2342-2486_bedGraph-cDNA-hits-in-genome.bedGraph.gz |
| NSUN2_293        | Nsun2          | HEK293 | iCLIP    | 23871666 | ICLIP_NSUN2_293_group_4007_all-NSUN2-293-hg19_sum_G_hg19-ensembl59_from_3137-3202_bedGraph-cDNA-hits-in-genome.bedGraph.gz               |
| TDP43_hg19       | TDB-43         | HeLa   | iCLIP    | 21358640 | ICLIP_TDP43_hg19.bedGraph.gz                                                                                                             |
| TIA1_hg19        | TIA1           | HeLa   | iCLIP    | 21048981 | ICLIP_TIA1_hg19.bedGraph.gz                                                                                                              |
| TIAL1_hg19       | TIAL1          | HeLa   | iCLIP    | 21048981 | ICLIP_TIAL1_hg19.bedGraph.gz                                                                                                             |
| U2AF65_Hela      | U2AF2          | HeLa   | iCLIP    | 23374342 | ICLIP_U2AF65_Hela_iCLIP_ctrl_all_clusters.bedGraph.gz                                                                                    |
| U2AF65_Hela_kd   | U2AF2 (KD)     | HeLa   | iCLIP    | 23374342 | ICLIP_U2AF65_Hela_iCLIP_ctrl+kd_all_clusters.bedGraph.gz                                                                                 |

\* All datasets, curated and partitioned by iONMF, are derived from publicly available data and can be downloaded here: [https://github.com/mstrazar/iONMF/tree/master\\_full/datasets/clip](https://github.com/mstrazar/iONMF/tree/master_full/datasets/clip).

**Supplementary Table 11. Summary of mouse CLIP sequencing datasets**

| Dataset*     | Target Protein | Source                        | Protocol | accession ID                                                                                                                                                                                                                              | Data file name   |
|--------------|----------------|-------------------------------|----------|-------------------------------------------------------------------------------------------------------------------------------------------------------------------------------------------------------------------------------------------|------------------|
| EZH2_mouse   | EZH2           | mESC                          | CLIP     | ['GSE49433', 'GSM1204909', 'GSM1204908', 'GSM1204907', 'GSM1204910']                                                                                                                                                                      | mmCLIP_EZH2.gz   |
| FUS_mouse    | FUS            | Brain & mESC-derived_n eurons | CLIP     | ['E-MTAB-1223', 'ERR208899', 'ERR208898', 'GSE40653', 'GSM998872', 'GSM998874', 'GSM998873', 'ERR208901', 'GSE43308', 'GSM1060384', 'GSM1060385']                                                                                         | mmCLIP_FUS.gz    |
| HNRNPR_mouse | HNRNPR         | CD-1 & NSC-34                 | CLIP     | ['GSE77101', 'GSM2044160', 'GSM2044162', 'GSM2044163', 'GSM2044161', 'GSM2044166', 'GSM2044167', 'GSM2044165', 'GSM2044169', 'GSM2044164', 'GSM2044168']                                                                                  | mmCLIP_HNRNPR.gz |
| LIN28A_mouse | LIN28A         | mESC                          | CLIP     | ['GSE37114', 'GSM910955', 'GSM910956', 'GSM910957']                                                                                                                                                                                       | mmCLIP_LIN28A.gz |
| RBFOX2_mouse | RBFOX2         | Brain & V6.5 Mandibular & MEP | CLIP     | ['SRP128054', 'SRX3532611', 'GSE54794', 'GSM1324105', 'GSM1324104', 'SRX3532612']                                                                                                                                                         | mmCLIP_RBFOX2.gz |
| RBM10_mouse  | RBM10          | Mouse_mandibular_MEP          | CLIP     | ['GSE89270', 'GSM2363437', 'GSM2363436', 'GSM2363438', 'GSM2363435']                                                                                                                                                                      | mmCLIP_RBM10.gz  |
| SRSF2_mouse  | SRSF2          | Fibroblast                    | CLIP     | ['GSE44591', 'GSM1088391']                                                                                                                                                                                                                | mmCLIP_SRSF2.gz  |
| SRSF3_mouse  | SRSF3          | P19& Embryonal                | CLIP     | ['GSE79792', 'GSM2102849', 'GSM2102855', 'E-MTAB-747', 'ERR039836', 'GSM2102848', 'GSM2102850', 'GSM2102854', 'ERR039837', 'GSM2102847', 'GSM2102858', 'GSM2102852', 'GSM2102853', 'GSM2102856', 'GSM2102857', 'GSM2102851', 'ERR039838'] | mmCLIP_SRSF3.gz  |
| TARDBP_mouse | TARDBP         | Brain                         | CLIP     | ['E-MTAB-1223', 'ERR208900', 'GSE40653', 'GSM998871', 'ERR208896', 'GSE27394', 'GSM672063', 'GSM672062', 'ERR208895']                                                                                                                     | mmCLIP_TARDBP.gz |
| U2AF2_mouse  | U2AF2          | Brain & N2A & SRRM4_K D & N2A | CLIP     | ['E-MTAB-1223', 'ERR208893', 'ERR208897', 'GSE57278', 'GSM1378379', 'GSM1378378']                                                                                                                                                         | mmCLIP_U2AF2.gz  |
| YTHDC2_mouse | YTHDC2         | Testis                        | CLIP     | ['GSE98085', 'GSM2586903', 'GSM2586904']                                                                                                                                                                                                  | mmCLIP_YTHDC2.gz |

\* All positive sequences, curated and partitioned by CLIPdb<sup>24</sup>, are derived from publicly available data and can be downloaded here: <http://clipdb.ncrnalab.org>.

## Supplementary Reference

1. Zhang, Y. et al. Single-step discovery of high-affinity RNA ligands by UltraSelex. *Nat Chem Biol* (2025).
2. Zhang, H., Zhang, L., Mathews, D.H. & Huang, L. LinearPartition: linear-time approximation of RNA folding partition function and base-pairing probabilities. *Bioinformatics* **36**, i258-i267 (2020).
3. Jolma, A. et al. Binding specificities of human RNA-binding proteins toward structured and linear RNA sequences. *Genome Res* **30**, 962-973 (2020).
4. Ameta, S., Winz, M.L., Previti, C. & Jaschke, A. Next-generation sequencing reveals how RNA catalysts evolve from random space. *Nucleic Acids Res* **42**, 1303-1310 (2014).
5. Pei, S., Slinger, B.L. & Meyer, M.M. Recognizing RNA structural motifs in HT-SELEX data for ribosomal protein S15. *BMC Bioinformatics* **18**, 298 (2017).
6. Boussebayle, A. et al. Next-level riboswitch development-implementation of Capture-SELEX facilitates identification of a new synthetic riboswitch. *Nucleic Acids Res* **47**, 4883-4895 (2019).
7. Zhang, J., Wang, L., Jaschke, A. & Sunbul, M. A Color-Shifting Near-Infrared Fluorescent Aptamer-Fluorophore Module for Live-Cell RNA Imaging. *Angew Chem Int Ed Engl* **60**, 21441-21448 (2021).
8. Whatley, A.S. et al. Potent Inhibition of HIV-1 Reverse Transcriptase and Replication by Nonpseudoknot, "UCAA-motif" RNA Aptamers. *Mol Ther Nucleic Acids* **2**, e71 (2013).
9. Camorani, S. et al. Novel Aptamers Selected on Living Cells for Specific Recognition of Triple-Negative Breast Cancer. *iScience* **23**, 100979 (2020).
10. Nguyen Quang, N., Bouvier, C., Henriques, A., Lelandais, B. & Duconge, F. Time-lapse imaging of molecular evolution by high-throughput sequencing. *Nucleic Acids Res* **46**, 7480-7494 (2018).
11. De La Fuente, A. et al. Aptamers against mouse and human tumor-infiltrating myeloid cells as reagents for targeted chemotherapy. *Sci Transl Med* **12** (2020).
12. Van Simaeys, D. et al. RNA aptamers specific for transmembrane p24 trafficking protein 6 and Clusterin for the targeted delivery of imaging reagents and RNA therapeutics to human beta cells. *Nat Commun* **13**, 1815 (2022).
13. Koyama, T., Platt, D. & Parida, L. Variant analysis of SARS-CoV-2 genomes. *Bull World Health Organ* **98**, 495-504 (2020).
14. van Zundert, G.C.P. et al. The HADDOCK2.2 Web Server: User-Friendly Integrative Modeling of Biomolecular Complexes. *J Mol Biol* **428**, 720-725 (2016).
15. Gao, Y. et al. Structure of the RNA-dependent RNA polymerase from COVID-19 virus. *Science* **368**, 779-782 (2020).
16. Abramson, J. et al. Accurate structure prediction of biomolecular interactions with AlphaFold 3. *Nature* (2024).

357 17. Strazar, M., Zitnik, M., Zupan, B., Ule, J. & Curk, T. Orthogonal matrix factorization  
358 enables integrative analysis of multiple RNA binding proteins. *Bioinformatics* **32**,  
359 1527-1535 (2016).

360 18. Zarnack, K. et al. Direct competition between hnRNP C and U2AF65 protects the  
361 transcriptome from the exonization of Alu elements. *Cell* **152**, 453-466 (2013).

362 19. Konig, J. et al. iCLIP reveals the function of hnRNP particles in splicing at individual  
363 nucleotide resolution. *Nat Struct Mol Biol* **17**, 909-915 (2010).

364 20. Rossbach, O. et al. Crosslinking-immunoprecipitation (iCLIP) analysis reveals global  
365 regulatory roles of hnRNP L. *RNA Biol* **11**, 146-155 (2014).

366 21. Hussain, S. et al. NSun2-mediated cytosine-5 methylation of vault noncoding RNA  
367 determines its processing into regulatory small RNAs. *Cell Rep* **4**, 255-261 (2013).

368 22. Tollervy, J.R. et al. Characterizing the RNA targets and position-dependent splicing  
369 regulation by TDP-43. *Nat Neurosci* **14**, 452-458 (2011).

370 23. Wang, Z. et al. iCLIP predicts the dual splicing effects of TIA-RNA interactions. *PLoS*  
371 *Biol* **8**, e1000530 (2010).

372 24. Yang, Y.C. et al. CLIPdb: a CLIP-seq database for protein-RNA interactions. *BMC*  
373 *Genomics* **16**, 51 (2015).

374 25. Tang, Y. et al. m6A-Atlas: a comprehensive knowledgebase for unraveling the N6-  
375 methyladenosine (m6A) epitranscriptome. *Nucleic Acids Res* **49**, D134-D143 (2021).

376 26. Yang, Y. et al. Deciphering 3'UTR Mediated Gene Regulation Using Interpretable  
377 Deep Representation Learning. *Adv Sci (Weinh)*, e2407013 (2024).

378 27. Wang, Z. et al. Deciphering cell lineage specification of human lung adenocarcinoma  
379 with single-cell RNA sequencing. *Nat Commun* **12**, 6500 (2021).

380 28. Kaiser, A.M. et al. p53 governs an AT1 differentiation programme in lung cancer  
381 suppression. *Nature* **619**, 851-859 (2023).

382
